# Supplementary material
Source: PubMed Central journal article supplement (PMC6866413)
Supplement: HBM-39-4820-s005.pdf [file HBM-39-4820-s005.pdf]

### CSR025-2 smooth 0

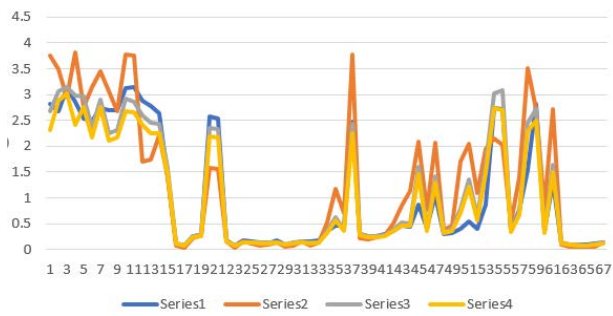

### CSR025-2 smooth 1

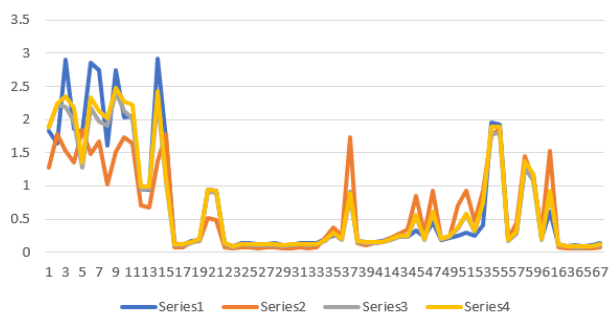

### CSR025-2 smooth 2

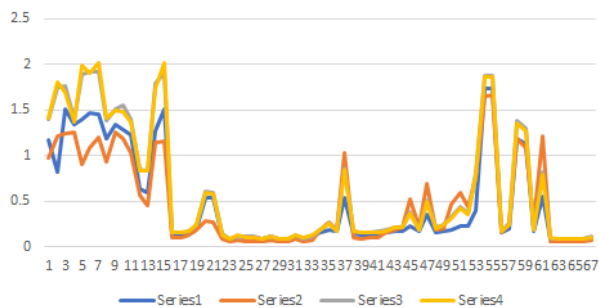

### CSR025-2 smooth 3

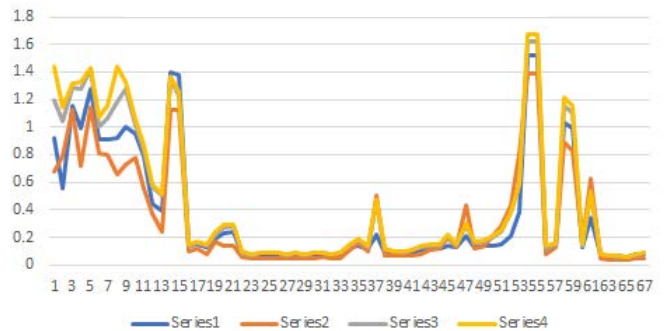

### CSR025-2 smooth 4

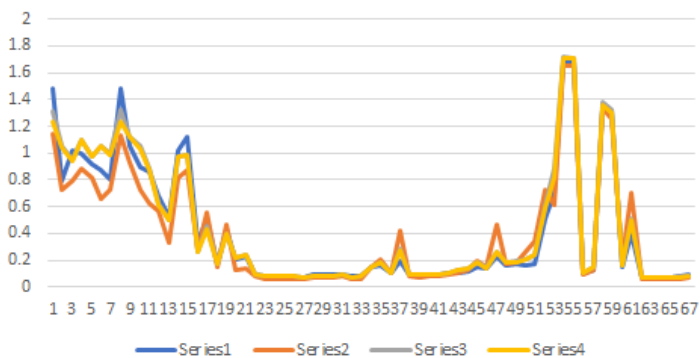

### CSR025-2 smooth 5

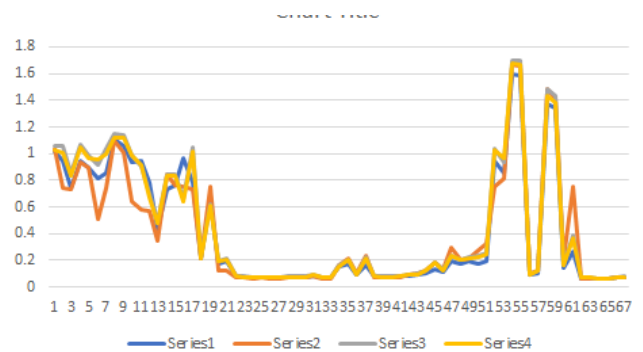

x axis: ROI number  
y axis: negative strength  
“series” T1 sequence

CSR026-5 smooth 0

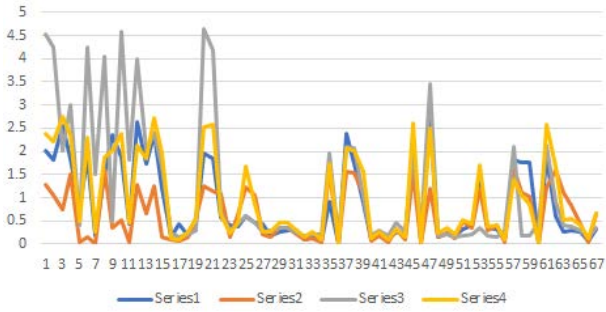

CSR026-5 smooth 1

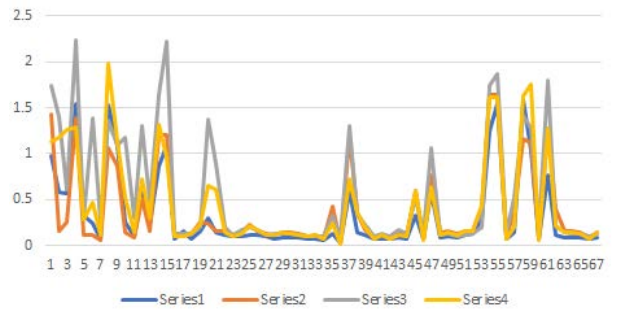

CSR026-5 smooth 2

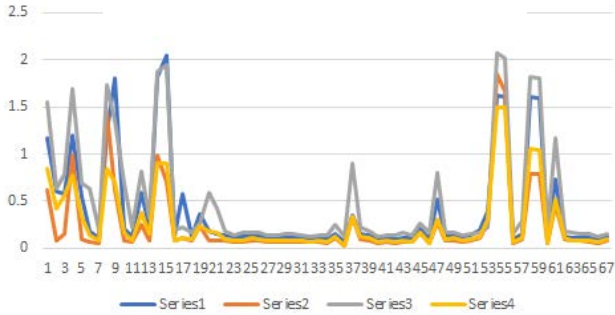

CSR026-5 smooth 3

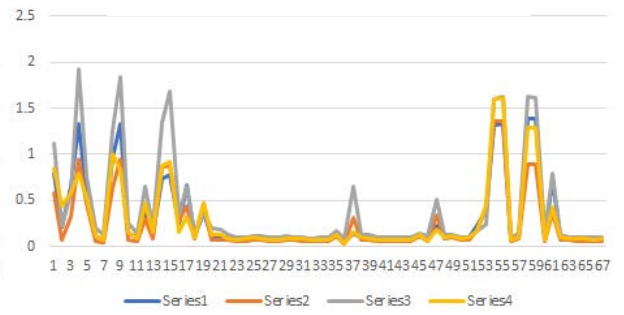

CSR026-5 smooth 4

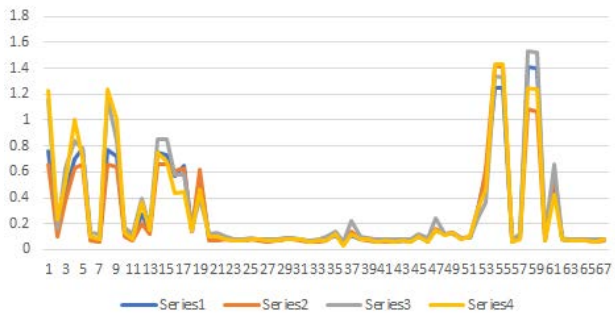

CSR026-5 smooth 5

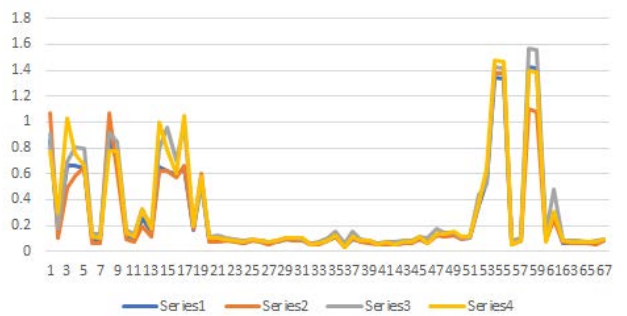

x axis: ROI number  
 y axis: negative strength  
 "series" T1 sequence
