# Supplementary material
Source: PubMed Central journal article supplement (PMC6866413)
Supplement: HBM-39-4820-s006.pdf [file HBM-39-4820-s006.pdf]

| ID                              | x   | y   | z   | autonomic nuclei patients (Fig 3) | raphe nuclei patients (Fig 3) | reticular nuclei patients (Fig 3) | periventricular gray patients (Fig 3) | other patients (Fig 3) | combined patients (Fig 3) | autonomic nuclei SUDEP (Fig 4) | other SUDEP (Fig 4) | reticular nuclei SUDEP (Fig 4) | colliculi & ventral tegmentum SUDEP (Fig 4) | raphe nuclei SUDEP (Fig 4) | combined SUDEP (Fig 4) |
|---------------------------------|-----|-----|-----|-----------------------------------|-------------------------------|-----------------------------------|---------------------------------------|------------------------|---------------------------|--------------------------------|---------------------|--------------------------------|---------------------------------------------|----------------------------|------------------------|
| autonomic 1                     | -6  | -42 | -59 | 0                                 | 0                             | 0                                 | 0                                     | 0                      | 0                         | 0                              | 0                   | 0                              | 0                                           | 0                          | 0                      |
| autonomic 2                     | -1  | -42 | -59 | 0                                 | 0                             | 0                                 | 0                                     | 0                      | 0                         | 0                              | 0                   | 0                              | 0                                           | 0                          | 0                      |
| autonomic 3                     | 4   | -42 | -59 | 1                                 | 0                             | 0                                 | 0                                     | 0                      | 0                         | 0                              | 0                   | 0                              | 0                                           | 0                          | 0                      |
| autonomic 4                     | -2  | -47 | -54 | 1                                 | 0                             | 0                                 | 0                                     | 0                      | 1                         | 0                              | 0                   | 0                              | 0                                           | 0                          | 0                      |
| autonomic 5                     | 3   | -47 | -54 | 1                                 | 0                             | 0                                 | 0                                     | 0                      | 0                         | 0                              | 0                   | 0                              | 0                                           | 0                          | 0                      |
| autonomic 6                     | -2  | -42 | -54 | 0                                 | 0                             | 0                                 | 0                                     | 0                      | 0                         | 0                              | 0                   | 0                              | 0                                           | 0                          | 0                      |
| autonomic 7                     | 3   | -42 | -54 | 0                                 | 0                             | 0                                 | 0                                     | 0                      | 0                         | 0                              | 0                   | 0                              | 0                                           | 0                          | 0                      |
| autonomic 8                     | -2  | -47 | -51 | 0                                 | 0                             | 0                                 | 0                                     | 0                      | 0                         | 0                              | 0                   | 0                              | 0                                           | 0                          | 0                      |
| autonomic 9                     | 3   | -47 | -51 | 1                                 | 0                             | 0                                 | 0                                     | 0                      | 0                         | 0                              | 0                   | 0                              | 0                                           | 0                          | 0                      |
| autonomic 10                    | -2  | -42 | 51  | 1                                 | 0                             | 0                                 | 0                                     | 0                      | 0                         | 1                              | 0                   | 0                              | 0                                           | 0                          | 0                      |
| autonomic 11                    | 3   | -42 | -51 | 0                                 | 0                             | 0                                 | 0                                     | 0                      | 0                         | 1                              | 0                   | 0                              | 0                                           | 0                          | 1                      |
| autonomic 12                    | -2  | -42 | -46 | 0                                 | 0                             | 0                                 | 0                                     | 0                      | 0                         | 0                              | 0                   | 0                              | 0                                           | 0                          | 0                      |
| autonomic 13                    | 3   | -42 | -46 | 1                                 | 0                             | 0                                 | 0                                     | 0                      | 1                         | 0                              | 0                   | 0                              | 0                                           | 0                          | 0                      |
| autonomic 14                    | -7  | -37 | -46 | 0                                 | 0                             | 0                                 | 0                                     | 0                      | 0                         | 0                              | 0                   | 0                              | 0                                           | 0                          | 0                      |
| autonomic 15                    | 8   | -37 | -46 | 0                                 | 0                             | 0                                 | 0                                     | 0                      | 0                         | 0                              | 0                   | 0                              | 0                                           | 0                          | 0                      |
| autonomic 16                    | -12 | -37 | -41 | 1                                 | 0                             | 0                                 | 0                                     | 0                      | 1                         | 0                              | 0                   | 0                              | 0                                           | 0                          | 0                      |
| autonomic 17                    | 13  | -37 | -41 | 0                                 | 0                             | 0                                 | 0                                     | 0                      | 0                         | 0                              | 0                   | 0                              | 0                                           | 0                          | 0                      |
| autonomic 18                    | -7  | -37 | -26 | 0                                 | 0                             | 0                                 | 0                                     | 0                      | 0                         | 0                              | 0                   | 0                              | 0                                           | 0                          | 0                      |
| autonomic 19                    | 8   | -37 | -26 | 1                                 | 0                             | 0                                 | 0                                     | 0                      | 1                         | 0                              | 0                   | 0                              | 0                                           | 0                          | 0                      |
| reticular 1                     | -2  | -37 | -46 | 0                                 | 0                             | 0                                 | 0                                     | 0                      | 0                         | 0                              | 0                   | 1                              | 0                                           | 0                          | 0                      |
| reticular 2                     | 3   | -37 | -46 | 0                                 | 0                             | 1                                 | 0                                     | 0                      | 0                         | 0                              | 0                   | 0                              | 0                                           | 0                          | 0                      |
| reticular 3                     | -7  | -37 | -41 | 0                                 | 0                             | 0                                 | 0                                     | 0                      | 0                         | 0                              | 0                   | 0                              | 0                                           | 0                          | 0                      |
| reticular 4                     | 8   | -37 | -41 | 0                                 | 0                             | 0                                 | 0                                     | 0                      | 0                         | 0                              | 0                   | 0                              | 0                                           | 0                          | 0                      |
| reticular 5                     | -7  | -37 | 36  | 0                                 | 0                             | 0                                 | 0                                     | 0                      | 0                         | 0                              | 0                   | 0                              | 0                                           | 0                          | 0                      |
| reticular 6                     | -2  | -37 | -36 | 0                                 | 0                             | 0                                 | 0                                     | 0                      | 0                         | 0                              | 0                   | 0                              | 0                                           | 0                          | 0                      |
| reticular 7                     | 3   | -37 | -36 | 0                                 | 0                             | 0                                 | 0                                     | 0                      | 0                         | 0                              | 0                   | 0                              | 0                                           | 0                          | 0                      |
| reticular 8                     | 8   | -37 | -36 | 0                                 | 0                             | 0                                 | 0                                     | 0                      | 0                         | 0                              | 0                   | 0                              | 0                                           | 0                          | 0                      |
| reticular 9                     | -7  | -37 | -31 | 0                                 | 0                             | 0                                 | 0                                     | 0                      | 0                         | 0                              | 0                   | 1                              | 0                                           | 0                          | 0                      |
| reticular 10                    | -2  | -37 | -31 | 0                                 | 0                             | 0                                 | 0                                     | 0                      | 0                         | 0                              | 0                   | 0                              | 0                                           | 0                          | 0                      |
| reticular 11                    | 3   | -37 | -31 | 0                                 | 0                             | 0                                 | 0                                     | 0                      | 0                         | 0                              | 0                   | 1                              | 0                                           | 0                          | 0                      |
| reticular 12                    | 8   | -37 | -31 | 0                                 | 0                             | 1                                 | 0                                     | 0                      | 0                         | 0                              | 0                   | 0                              | 0                                           | 0                          | 0                      |
| reticular 13                    | -2  | -32 | -26 | 0                                 | 0                             | 0                                 | 0                                     | 0                      | 0                         | 0                              | 0                   | 1                              | 0                                           | 0                          | 0                      |
| reticular 14                    | 3   | -32 | -26 | 0                                 | 0                             | 0                                 | 0                                     | 0                      | 0                         | 0                              | 0                   | 1                              | 0                                           | 0                          | 0                      |
| reticular 15                    | -7  | -32 | -16 | 0                                 | 0                             | 0                                 | 0                                     | 0                      | 0                         | 0                              | 0                   | 0                              | 0                                           | 0                          | 0                      |
| reticular 16                    | 8   | -32 | -16 | 0                                 | 0                             | 0                                 | 0                                     | 0                      | 0                         | 0                              | 0                   | 0                              | 0                                           | 0                          | 0                      |
| reticular 17                    | -7  | -27 | -11 | 0                                 | 0                             | 0                                 | 0                                     | 0                      | 0                         | 0                              | 0                   | 1                              | 0                                           | 0                          | 0                      |
| reticular 18                    | 8   | -27 | -11 | 0                                 | 0                             | 0                                 | 0                                     | 0                      | 0                         | 0                              | 0                   | 1                              | 0                                           | 0                          | 0                      |
| raphe 1                         | -2  | -37 | -41 | 0                                 | 1                             | 0                                 | 0                                     | 0                      | 0                         | 0                              | 0                   | 0                              | 0                                           | 0                          | 0                      |
| raphe 2                         | 3   | -37 | -41 | 0                                 | 1                             | 0                                 | 0                                     | 0                      | 0                         | 0                              | 0                   | 0                              | 0                                           | 0                          | 0                      |
| raphe 3                         | -2  | -32 | -21 | 0                                 | 0                             | 0                                 | 0                                     | 0                      | 0                         | 0                              | 0                   | 0                              | 0                                           | 0                          | 0                      |
| raphe 4                         | 3   | -32 | -21 | 0                                 | 0                             | 0                                 | 0                                     | 0                      | 0                         | 0                              | 0                   | 0                              | 0                                           | 1                          | 0                      |
| raphe 5                         | -2  | -32 | -16 | 0                                 | 1                             | 0                                 | 0                                     | 0                      | 0                         | 0                              | 0                   | 0                              | 0                                           | 1                          | 0                      |
| raphe 6                         | 3   | -32 | -16 | 0                                 | 0                             | 0                                 | 0                                     | 0                      | 0                         | 0                              | 0                   | 0                              | 0                                           | 0                          | 0                      |
| raphe 7                         | -2  | -32 | -11 | 0                                 | 0                             | 0                                 | 0                                     | 0                      | 0                         | 0                              | 0                   | 0                              | 0                                           | 0                          | 0                      |
| raphe 8                         | 3   | -32 | -11 | 0                                 | 0                             | 0                                 | 0                                     | 0                      | 0                         | 0                              | 0                   | 0                              | 0                                           | 0                          | 0                      |
| raphe 9                         | -2  | -27 | -11 | 0                                 | 0                             | 0                                 | 0                                     | 0                      | 0                         | 0                              | 0                   | 0                              | 0                                           | 0                          | 0                      |
| raphe 10                        | 3   | -27 | -11 | 0                                 | 0                             | 0                                 | 0                                     | 0                      | 0                         | 0                              | 0                   | 0                              | 0                                           | 1                          | 1                      |
| periaqueductal gray 1           | -2  | -37 | -21 | 0                                 | 0                             | 0                                 | 1                                     | 0                      | 1                         | 0                              | 0                   | 0                              | 0                                           | 0                          | 0                      |
| periaqueductal gray 2           | 3   | -37 | -21 | 0                                 | 0                             | 0                                 | 0                                     | 0                      | 0                         | 0                              | 0                   | 0                              | 0                                           | 0                          | 0                      |
| periaqueductal gray 3           | -2  | -37 | -16 | 0                                 | 0                             | 0                                 | 0                                     | 0                      | 0                         | 0                              | 0                   | 0                              | 0                                           | 0                          | 0                      |
| periaqueductal gray 4           | 3   | -37 | -16 | 0                                 | 0                             | 0                                 | 0                                     | 0                      | 0                         | 0                              | 0                   | 0                              | 0                                           | 0                          | 0                      |
| periaqueductal gray 5           | -2  | -37 | -11 | 0                                 | 0                             | 0                                 | 0                                     | 0                      | 0                         | 0                              | 0                   | 0                              | 0                                           | 0                          | 0                      |
| periaqueductal gray 6           | 3   | -37 | -11 | 0                                 | 0                             | 0                                 | 0                                     | 0                      | 0                         | 0                              | 0                   | 0                              | 0                                           | 0                          | 0                      |
| colliculi & ventral tegmentum 1 | -2  | -37 | -16 | 0                                 | 0                             | 0                                 | 0                                     | 0                      | 0                         | 0                              | 0                   | 0                              | 0                                           | 0                          | 0                      |
| colliculi & ventral tegmentum 2 | 3   | -37 | -16 | 0                                 | 0                             | 0                                 | 0                                     | 0                      | 0                         | 0                              | 0                   | 0                              | 1                                           | 0                          | 0                      |
| colliculi & ventral tegmentum 3 | -2  | -22 | -16 | 0                                 | 0                             | 0                                 | 0                                     | 0                      | 0                         | 0                              | 0                   | 0                              | 0                                           | 0                          | 0                      |
| colliculi & ventral tegmentum 4 | 3   | -22 | -16 | 0                                 | 0                             | 0                                 | 0                                     | 0                      | 0                         | 0                              | 0                   | 0                              | 0                                           | 0                          | 0                      |
| colliculi & ventral tegmentum 5 | -2  | -37 | -11 | 0                                 | 0                             | 0                                 | 0                                     | 0                      | 0                         | 0                              | 0                   | 0                              | 1                                           | 0                          | 0                      |
| colliculi & ventral tegmentum 6 | 3   | -37 | -11 | 0                                 | 0                             | 0                                 | 0                                     | 0                      | 0                         | 0                              | 0                   | 0                              | 1                                           | 0                          | 0                      |
| colliculi & ventral tegmentum 7 | -2  | -17 | -11 | 0                                 | 0                             | 0                                 | 0                                     | 0                      | 0                         | 0                              | 0                   | 0                              | 0                                           | 0                          | 0                      |
| colliculi & ventral tegmentum 8 | 3   | -17 | -11 | 0                                 | 0                             | 0                                 | 0                                     | 0                      | 0                         | 0                              | 0                   | 0                              | 0                                           | 0                          | 0                      |
| tracts 1                        | -2  | -30 | -41 | 0                                 | 0                             | 0                                 | 0                                     | 1                      | 0                         | 0                              | 0                   | 0                              | 0                                           | 0                          | 0                      |
| tracts 2                        | 3   | -30 | -41 | 0                                 | 0                             | 0                                 | 0                                     | 0                      | 0                         | 0                              | 0                   | 0                              | 0                                           | 0                          | 0                      |
| tracts 3                        | -2  | -32 | -36 | 0                                 | 0                             | 0                                 | 0                                     | 0                      | 0                         | 0                              | 0                   | 0                              | 0                                           | 0                          | 0                      |
| tracts 4                        | 3   | -32 | -36 | 0                                 | 0                             | 0                                 | 0                                     | 0                      | 0                         | 0                              | 0                   | 0                              | 0                                           | 0                          | 0                      |
| tracts 5                        | -7  | -32 | -26 | 0                                 | 0                             | 0                                 | 0                                     | 0                      | 0                         | 0                              | 0                   | 0                              | 0                                           | 0                          | 0                      |
| tracts 6                        | 8   | -32 | -26 | 0                                 | 0                             | 0                                 | 0                                     | 0                      | 0                         | 0                              | 1                   | 0                              | 0                                           | 0                          | 0                      |
